1 **Diverse but unique astrocytic phenotypes during embryonic stem cell differentiation,**  
2 **culturing and aging**

3 Kiara Freitag<sup>1,2\*</sup>, Pascale Eede<sup>1\*,§</sup>, Andranik Ivanov<sup>3</sup>, Shirin Schneeberger<sup>1,5</sup>, Tatiana Borodina<sup>4</sup>, Sascha  
4 Sauer<sup>4</sup>, Dieter Beule<sup>3</sup>, Frank L. Heppner<sup>1,2,5#</sup>

5 <sup>1</sup> Charité – Universitätsmedizin Berlin, corporate member of Freie Universität Berlin and Humboldt-  
6 Universität zu Berlin, Department of Neuropathology, Charitéplatz 1, 10117 Berlin, Germany

7 <sup>2</sup> German Center for Neurodegenerative Diseases (DZNE) within the Helmholtz Association, Berlin,  
8 Germany

9 <sup>3</sup> Core Unit Bioinformatics, Berlin Institute of Health, Charité - University Hospital Berlin, 10117  
10 Berlin, Germany

11 <sup>4</sup> Scientific Genomics Platforms, Max Delbrück Center for Molecular Medicine (MDC) in the Helmholtz  
12 Society, Berlin, Germany and Berlin Institute of Health (BIH), Berlin, Germany

13 <sup>5</sup> Cluster of Excellence, NeuroCure, Berlin, Germany

14 \* Contributed equally

15 <sup>§</sup> Present address: Evotec SE, Essener Bogen 7, 22419 Hamburg, Germany

16 # Corresponding author

17 **Summary**

18 Astrocytes are resident glia cells of the central nervous system (CNS) that play complex and  
19 heterogeneous roles in brain development, homeostasis and disease. Since their vast involvement in  
20 health and disease is becoming increasingly recognized, suitable and reliable tools for studying these  
21 cells *in vivo* and *in vitro* are of utmost importance. One of the key challenges hereby is to adequately  
22 mimic their context-dependent *in vivo* phenotypes and functions *in vitro*. To better understand the  
23 spectrum of astrocytic variations in defined settings we performed a side-by-side-comparison of  
24 embryonic stem cell (ESC)-derived astrocytes as well as primary neonatal and adult astrocytes,  
25 revealing major differences on a functional and transcriptomic level, specifically on proliferation,  
26 migration, calcium signaling and cilium activity. Our results highlight the need to carefully consider  
27 the choice of astrocyte origin and phenotype with respect to age, isolation and culture protocols  
28 based on the respective biological question.

29

30 **Key words:** Astrocytes, Stem cells, Aging, Cell culture model

## 31 Introduction

32 Astrocytes are central nervous system (CNS)-resident glia cells that have long been considered as  
33 passive supporting cells, yet they have recently caught major attention due to their involvement in  
34 many neurological diseases. Astrocytes form vast intracellular and intercellular networks within the  
35 brain that influence homeostatic cell metabolism and function <sup>1,2</sup>. As the main constituent of the  
36 neurovascular junction, astrocytes ensure the energy supply to the brain <sup>3,4,5</sup> whilst also controlling  
37 neuronal health by recycling neurotransmitters and by promoting the formation of neural networks  
38 <sup>6</sup>. Conversely, due to their crucial role in brain homeostasis, dysfunction of astrocytes has a  
39 substantial impact on brain disorders, in particular upon neurodegenerative and neuroinflammatory  
40 diseases <sup>7</sup>.

41 With an increasing need to properly assess astrocytes, the need for efficient isolation and culturing  
42 protocols keeping astrocytes close to their *in vivo* profile rises. Many methods to isolate and study  
43 murine astrocytes have been established, yet such approaches need to be carefully selected based  
44 on the underlying scientific question <sup>8</sup>. *In vitro* approaches using primary astrocytes provide a useful  
45 platform to dissect specific astrocytic functions and molecular mechanisms, however maintaining an  
46 *in vivo*-like phenotype has been a major challenge. It is widely known that the classic astrocyte  
47 isolation technique using postnatal rodent brains based on McCarthy and de Vellis <sup>9</sup> induces a  
48 reactive astrocytic phenotype <sup>10</sup>, thus changing the presumed *in vivo* profile of astrocytes. Similarly,  
49 astrocytic developmental stages along with their functional and transcriptomic differences are often  
50 not taken into account or compared between isolation techniques. Consequently, many studies  
51 assessing astrocyte functions only rely on cultures from neonatal astrocytes, thus neglecting the  
52 major functional changes that occur context-dependently during development and aging <sup>11,12,13</sup>.

53 To generate a baseline reference of transcriptomic and functional changes of various astrocyte  
54 culture settings and origins, we compared magnetic activated cell sorted (MACS) ACSA-2-positive  
55 murine astrocytes <sup>14,15</sup> isolated from (1) neonatal and from (2) adult wild-type mice to (3) astrocytes  
56 generated from embryonic stem cells (ESC) (AGES) <sup>16</sup>. So far, thorough side-by-side comparisons of  
57 ESC- or induced pluripotent stem cell (iPSC)-derived astrocytes to their primary adult and neonatal  
58 counterparts taking phenotypic, functional and transcriptomic characteristics into account are to our  
59 knowledge lacking. Additionally, we investigated how cellular properties of neonatal and adult  
60 astrocytes change upon culturing in order to highlight which *in vivo* functions are specifically altered  
61 in an *in vitro* setting. Analysis of astrocyte markers, transcriptomic profiles and functional properties  
62 revealed major differences between the various astrocyte populations. Whilst functions related to  
63 trophic support such as synaptic vesicle transport and dendritic spine development were lost upon  
64 culturing of primary astrocytes, key age-specific differences in cilium expression were retained. AGES  
65 displayed distinctive transcriptomic and functional signatures resembling astrocytic characteristics  
66 that did not fully align with primary astrocyte profiles and most likely represent an intermediate state  
67 between primary cells and neural stem cells (NSCs). These data highlight the importance of carefully  
68 aligning experimental requirements to the underlying biological question when assessing astrocytic  
69 properties *in vitro* and *ex vivo*.

## 70 **Results & Discussion**

### 71 ***Distinct astrocytic marker profiles between AGES, cultured and directly isolated primary astrocytes***

72

73 Given their vital functions in health and disease, it is essential to have valid and robust astrocyte *in*  
74 *vitro* models allowing to assess their particular contributions in physiological as well as CNS disease  
75 settings. Therefore, we compared the protein and transcriptomic profiles of three widely used  
76 astrocytic cell types, namely of cultured and freshly isolated neonatal and adult astrocytes as well as  
77 AGES. Whole hemisphere neonatal astrocytes were isolated from four- to eight-day-old C57BL/6J  
78 wild type mice by MACS using the neural tissue dissociation kit (NTDK) and anti-ACSA-2 magnetic  
79 microbeads (Fig. 1A). For adult astrocyte populations, cells were isolated from > 100-day old  
80 C57BL/6J mice also using MACS, with the only change that the adult brain dissociation kit (ABDK)  
81 including debris and red blood cell removal steps was used (Fig. 1B). Cultured cells were used for  
82 downstream analyses after 7-10 days *in vitro*. For evaluating how efficiently AGES may replace  
83 primary astrocytes for the purpose of *in vitro* studies, murine ESCs (mESC) were differentiated into  
84 NSCs. After reaching purity (Fig. S2A), NSCs were terminally differentiated into AGES within three to  
85 five days by adding bone morphogenetic protein 4 (BMP4)<sup>16</sup> (Fig. 1C). Fluorescence activated cell  
86 sorting (FACS) for the astrocyte-specific cell surface marker ACSA-2 indicated that directly isolated  
87 astrocytes showed the highest level of purity (97-98.7 %), which was slightly reduced upon culturing  
88 and in AGES (Fig. S1A-F). Due to high purity levels in all conditions, we consider MACS as a suitable  
89 method for the isolation of pure neonatal and adult astrocyte populations. As ACSA-2 is also  
90 expressed by a few non-astrocytic cell types such as glial progenitor cells, neural stem cells and radial  
91 glia<sup>15,17</sup>, we extended our purity analysis by assessing a wide range of established astrocytic markers.  
92 Staining for the astrocytic intermediate filament proteins GFAP and Nestin as well as the astrocytic  
93 glutamate transporters GLAST and GLT-1 revealed that all astrocytic cells expressed these markers  
94 (Fig. 1D-F). Gene expression analysis of astrocytic cell markers showed increased *Gfap* expression  
95 levels in cultured primary cells and in AGES (Fig. 1G). However, GFAP expression can vary greatly  
96 between astrocytic cell populations, physical activity and reactive states<sup>18</sup>, highlighting the need to  
97 include a wider range of astrocytic cell markers<sup>19</sup>. Compared to directly snap-frozen neonatal  
98 astrocytes, expression of *Aldh1l1* was reduced in cultured cells and hardly seen in AGES (Fig. 1H). In  
99 contrast, *Slc1a3* (Glast) levels were highest in directly isolated neonatal and adult astrocytes and  
100 similar in all three cultured cell types (Fig. 1I). Neonatal and adult astrocyte cultures therefore mimic  
101 previously described maturation-dependent gene expression patterns<sup>13,20</sup>, whilst AGES do not fully  
102 reflect the marker profile of primary neonatal or adult astrocytes which could also be influenced by  
103 the differing culturing conditions. Gene expression analysis of non-astrocytic cell markers revealed  
104 that presence of microglia and oligodendrocytes can vary with the age and culturing of astrocytes  
105 (Fig. S1G-J). When characterizing astrocyte cultures, a wide range of astrocytic and non-astrocytic  
106 markers should therefore be used.

107

108 ***Similarities in glucose uptake, lactate release and synaptosome uptake oppose differences in***  
109 ***proliferative, migratory and calcium signaling in AGES and astrocyte cultures***

110

111 To investigate whether the differences seen in the astrocytic marker profile also implicate differences  
112 in functional properties, we assessed the maintenance of homeostatic functions of astrocytes in  
113 culture. Proliferation in astrocytes is known to cease with ageing<sup>21</sup>, which we confirmed in an 5-  
114 ethynyl-2'-deoxyuridine (EdU)-based assay, where cultured adult astrocytes proliferated less than  
115 neonatal astrocytes, while AGES, as terminally-differentiated cells, showed a proliferation rate similar  
116 to adult astrocytes (Fig. 2A) which was not influenced by the amount of dying cells (Fig. 2B). To mimic  
117 wound healing upon tissue injury, a major feature of astrocytes *in vivo*, a confluent astrocyte layer  
118 was disrupted by creating a wound gap *in vitro*, showing that adult astrocytes migrate or sense  
119 wound gaps significantly faster than neonatal astrocytes and AGES, with AGES exerting a very slow  
120 response rate (Fig. 2C-F, Fig. S2B-C). Assessing further physiological functions of astrocytes such as  
121 metabolism of glucose and lactate<sup>22</sup> as well as synapse elimination<sup>23</sup> revealed no differences  
122 between primary cultured astrocytes and AGES (Fig. 2G-I), emphasizing that AGES are a suitable *in*  
123 *vitro* model for assessing these physiological functions of astrocytes. To investigate calcium signaling  
124 as the main communication system of astrocytes<sup>24</sup> we performed live imaging of astrocytes  
125 incubated with the calcium indicator Fluo-4, which is coupled with acetoxymethyl (AM) to ensure  
126 fluorescence only after cell entry (Fig. 2J-N). We found that AGES responded fastest to ATP  
127 stimulation (Fig. 2L) and their maximum fluorescent intensity i.e. the amount of calcium released,  
128 was highest compared to neonatal and adult astrocytes (Fig. 2M), which is in line with previous  
129 reports showing that the amplitude of the spontaneous calcium spike was significantly higher in  
130 human iPSC-astrocytes compared to primary astrocytes<sup>25</sup>. No differences in the duration of the  
131 calcium response were seen between the cell types (Fig. 2N). Taken together, key differences in  
132 functions of AGES compared to primary astrocyte cultures were found in proliferation, response to  
133 wound gaps and calcium release properties. Notably, it was suggested that even in instances of  
134 damage, cell migration might rather be a non-physiological function of astrocytes *in vivo* and may  
135 represent a behavior only acquired in culture system *in vitro*<sup>26</sup>. Despite showing differences to  
136 primary astrocytes, AGES might therefore be more suitable in modelling the *in vivo*-like migration  
137 behavior of astrocytes. Thus, it is of utmost relevance to consider the identified functional  
138 differences when choosing a model system for a respective biological investigation.

139

#### 140 ***Transcriptomic profiling of astrocytes reveals major differences introduced by cell culturing, age*** 141 ***and cell origin***

142

143 To obtain a deeper understanding of the similarities and differences of directly isolated and cultured  
144 neonatal and adult astrocytes as well as AGES and NSCs, we performed an unbiased transcriptional  
145 profiling using RNA sequencing (RNA-seq). First, we aimed to delineate the differences we identified  
146 with regards to astrocyte marker expression as well as glial cell migration, calcium signaling and  
147 synapse pruning on the transcriptomic level. We therefore performed principal component analysis  
148 (PCA) on functionally grouped genes and confirmed key differences in astrocyte marker gene  
149 expression between cell types and culture conditions (Table S1, Fig. S3A), supplementing our analysis  
150 of astrocytic markers on the mRNA and protein levels (Fig. 1D-I). Additionally, we observed that gene

151 signatures corresponding to glial cell migration (Fig. S3B) and calcium signaling (Fig. S3C) separated  
152 AGES from primary astrocytes, matching the observed functional differences in wound gap and  
153 calcium responses. PCA analysis using genes related to synapse pruning, revealed clustering of AGES  
154 and cultured astrocytes separately from NSCs, validating their similarities in the synapse uptake assay  
155 (Fig. S3D). This analysis of functionally annotated gene clusters also indicated differences between  
156 cultured and directly isolated astrocytes supporting the notion that the migratory and synapse  
157 pruning capacity of astrocytes change upon culturing.

158 To obtain an unbiased view upon the transcriptional differences between our various astrocyte  
159 populations, we performed a PCA using the complete transcriptomic signature of each cell type,  
160 which showed appreciable variation between cell types up to the fourth component (Fig. 3A-C). To  
161 functionally annotate the underlying genetic differences driving the PCA, we applied gene set  
162 enrichment analysis to the genes constituting the four PCs (Fig. 3D-E; Table S3 for complete gene set  
163 list). Additionally, differentially expressed genes between two sets of cell types were identified and  
164 functionally annotated using the R tmod package for gene set enrichment analysis<sup>44</sup> (Fig. 3F, Fig. S3F,  
165 Table S2 for complete gene set list).

166

167 Many studies neglect the comparison of stem-cell derived models to either neonatal or adult primary  
168 astrocytes and only show comparisons to ESCs and NSCs. The few studies that did compare iPSC-  
169 derived astrocytes to primary cells<sup>25,27</sup> did not perform global assessments of phenotypic, functional  
170 and transcriptional differences. Our transcriptomic analysis showed that primary astrocytes  
171 expressed genes involved in cilium and axoneme function (PC1 left), with NSCs and AGES being  
172 characterized by increases in translation initiation, RNA processing and proteasome activity (PC1  
173 right) (Fig. 3B, D). tmod analysis comparing AGES to cultured primary cells identified the  
174 downregulation of genes related to DNA replication, cerebellar granular layer development and  
175 microtubule bundle formation and alterations in astrocyte cell differentiation genes (Fig. 3F). The  
176 negative regulation of adherens junction organization and cilium function (Fig. 3F) could explain the  
177 observed differences in closing wound gaps in AGES, as they are crucial for a rapid cell-cell contact  
178 remodeling during wounding<sup>28,29</sup>. Underling our findings, PCA analysis using published transcriptomic  
179 data of other murine stem-cell derived astrocytes<sup>30</sup> revealed a clear separation from primary  
180 astrocytes indicating major gene expression changes between primary and stem cell-derived cells  
181 (Fig. S3E). The major gene expression and functional differences identified in our study indicate that  
182 AGES are not yet fully differentiated into astrocytes usually assisted and driven by the brain's  
183 microenvironment and thus have not yet reached the functional and genetic profile of primary  
184 astrocytes. In order for stem-cell derived astrocytes to serve as a tool to study a broad range of  
185 astrocyte functions, we need to fully understand their similarities and differences to primary  
186 astrocytes and culture protocols need to be adapted to more closely match the profiles of primary  
187 cells.

188 Culturing of astrocytes induced upregulation of genes enriched in translation initiation, RNA  
189 processing, proteasome activity, chemotaxis and vesicle transport (PC2 top/PC3 right), and the  
190 downregulation of genes involved in autophagy, inositol lipid pathway and synaptic vesicle transport

191 (PC2 bottom) and cell division (PC3 left, Fig. 3B-E). tmod analysis specifically revealed downregulation  
192 of cilium functions and microtubule formation and an upregulation of cell division-related genes in  
193 adult astrocytes upon culturing. Neonatal astrocytes, on the other hand, upregulated microtubule  
194 formation and cilium functions *in vitro* (Fig. 3F). One of very few studies comparing directly isolated  
195 and cultured astrocytes found a downregulation of Wnt and Notch signaling upon culturing of  
196 neonatal astrocytes isolated by immunopanning<sup>11</sup>. Interestingly, primary cilia alterations identified in  
197 our study are known to modulate the transduction of Wnt signaling<sup>31</sup>. To our knowledge, alterations  
198 introduced by cell culturing of adult astrocytes were not assessed so far. In summary, the changes  
199 introduced *in vitro* thus reflect the change in microenvironment upon culturing in an age-dependent  
200 manner since the metabolic support of other cells is no longer required. AGES compared to NSCs  
201 downregulated genes indicative of cell cycle regulation and upregulated autophagy-related genes  
202 (PC2, Fig. 3B, D, F) which are common features of NSC differentiation<sup>32,33</sup> and indicates successful  
203 reprogramming into a new lineage with a modest proliferation behavior typical for astrocytes<sup>11</sup>.

204 Age-specific differences included upregulated protein trafficking in adult astrocytes (PC4 top) and  
205 increased respiration, cell-cell adhesion, synapse regulation and stem cell division in neonatal  
206 astrocytes (PC4 bottom) (Fig. 3C, E). tmod analysis revealed that, *in vitro*, neonatal astrocytes show a  
207 pronounced upregulation of cilium functions and microtubule formation, compared to adult  
208 astrocytes. Directly isolated neonatal astrocytes showed alterations in genes linked to cerebellar  
209 granular layer development along with a downregulation in microtubule formation and cilium  
210 movement in contrast to directly isolated adult astrocytes (Fig. 3F). Thus, both the neonatal and  
211 astrocyte cultures retain key physiological functional characteristics carried out during postnatal  
212 neural development and aging respectively<sup>6</sup>.

213 We identified striking differences in cilia function observed between primary astrocytes and AGES yet  
214 also between neonatal and adult astrocytes. Primary non-motile cilia have been described in both  
215 astrocytes<sup>34</sup> as well as human embryonic and neural stem cells<sup>35,36</sup> and are known to regulate cell  
216 division, neurogenesis, cell development and the response to certain extracellular signals<sup>34, 37, 38, 39</sup>.  
217 Whilst the presence of primary cilia has not yet been described in stem-cell derived astrocytes, our  
218 results indicate that cilia properties in AGES compared to primary astrocytes are very different, yet  
219 also depend on maturation and culturing. These differential stages of cilia development and altered  
220 ciliogenesis in AGES, could also provide an explanation for their differential response to wound gaps.  
221 All in all, the transcriptomic differences we observed were driven by cell origin (primary vs. NSC-  
222 derived cells), culturing of cells and developmental stage of primary cells (Fig. S4).

223 In summary, our in-depth molecular side-by-side analysis of directly isolated and cultured mouse  
224 primary astrocytes and AGES showed clear differences in astrocyte marker profiles, functional  
225 readouts and transcriptomic signatures. Physiological *in vivo* functions driven by intercellular  
226 interactions are lost in cultured primary astrocytes. Although *in vitro* modelling of astrocytes is an  
227 inevitable tool which has been crucial for vital advances and discoveries, our data highlights the need  
228 to better mimic the CNS microenvironment *in vitro* when investigating trophic support provided by  
229 astrocytes. Generating a CNS microenvironment in culture might also assist in differentiating ESCs or  
230 iPSCs into mature astrocytes with closer similarity to primary astrocytes, since transcriptome

231 analyses indicated that AGES are not yet fully differentiated. Our investigation is also aimed at  
232 supplementing future analyses and comparisons of astrocyte differentiation and culturing protocols  
233 also in the context of regional astrocytic differences. Further, our study highlights the importance of  
234 making informed decisions about the biological question under investigation and to match it to a  
235 suitable astrocyte isolation and cultivation protocol.



**Figure 1**

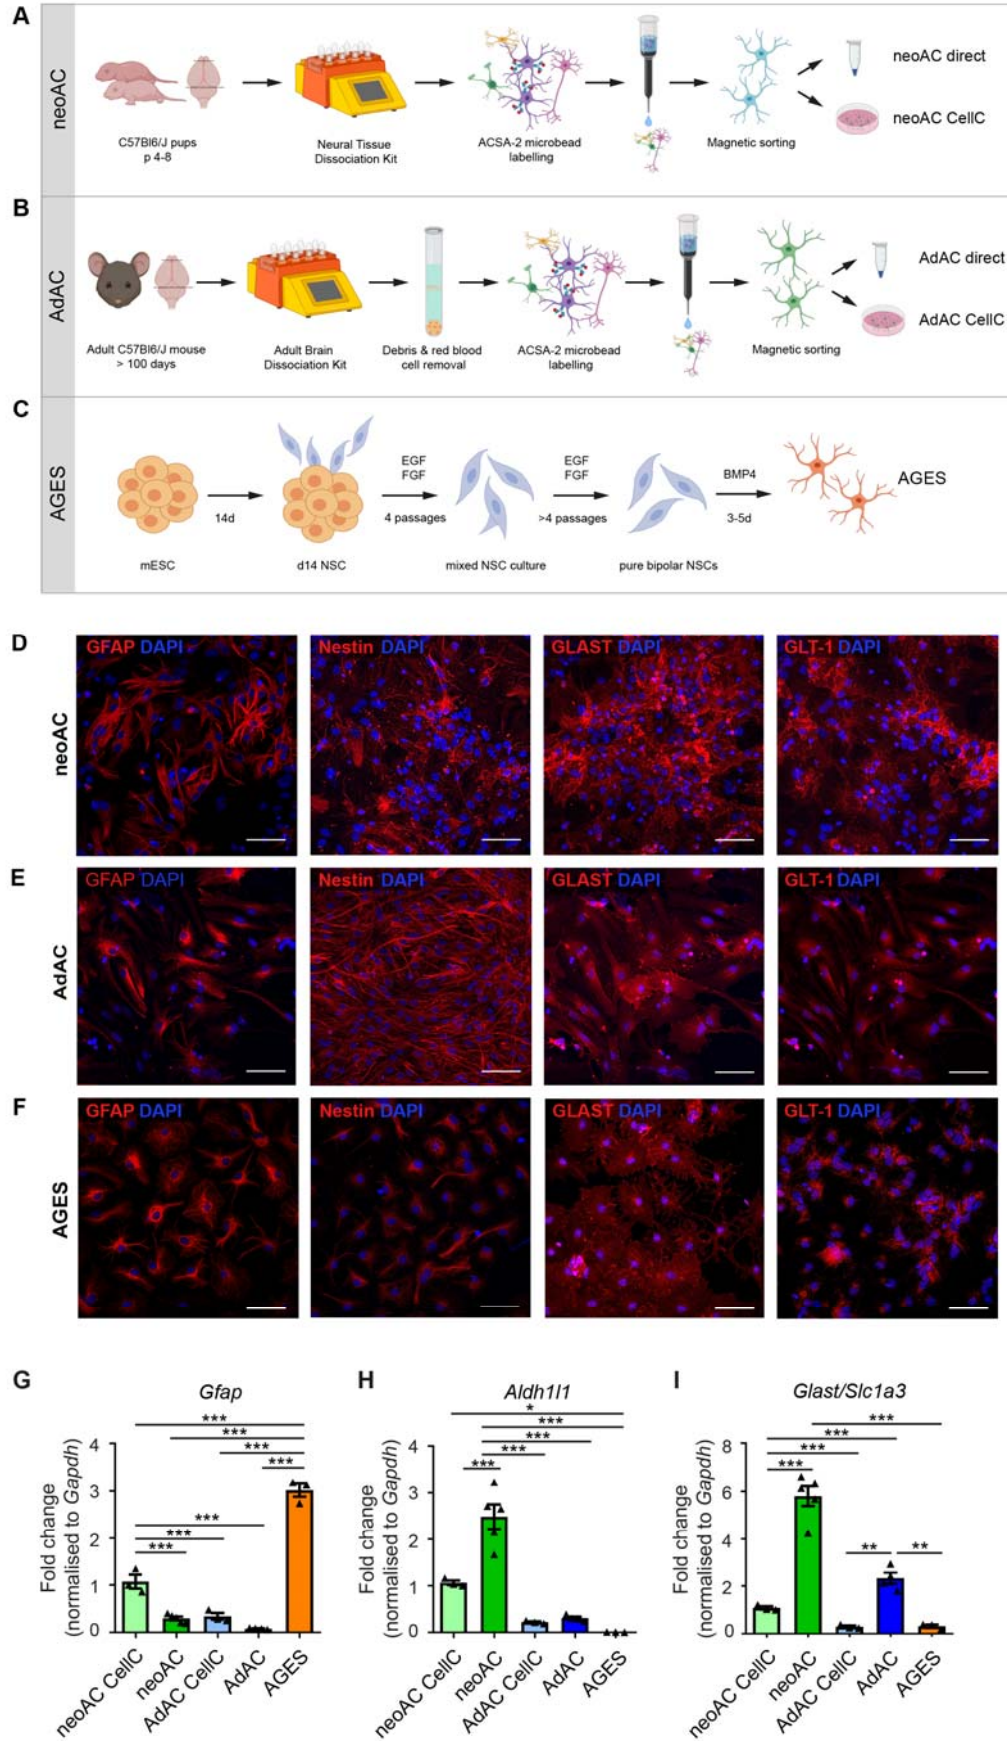

**Figure 1: Distinct astrocytic marker profiles between AGES, cultured and directly isolated primary astrocytes**

(A) Neonatal astrocytes (neoAC) were isolated from four- to eight-day-old C57BL/6J mice by magnetic activated cell sorting (MACS) using the neural tissue dissociation kit (NTDK) and anti-ACSA-2 magnetic microbeads. Cells were either snap-frozen (neoAC direct) or cultured (neoAC CellC). (B) Adult astrocytes (AdAC) were isolated from >100d C57BL/6J mice by MACS using the adult brain dissociation kit (ABDK) including a debris removal and red blood cell removal step followed by ACSA-2 microbead labelling. Cells were either snap-frozen (AdAC direct) or cultured (AdAC CellC). (C) Astrocytes generated from embryonic stem cells (AGES) were differentiated from mouse embryonic stem cells (mESCs) by creating neural stem cells (NSCs). For receiving pure bipolar NSC cultures, NSCs were cultured for at least eight passages in medium containing the growth factors EGF and FGF. Differentiation into AGES was induced by adding bone morphogenetic protein 4 (BMP4) for three to five days. (D-F) Fluorescent immunocytochemistry of (D) cultured neonatal astrocytes, (E) cultured adult astrocytes and (F) AGES was performed for the astrocytic marker proteins: glial fibrillary acidic protein (GFAP), Nestin and the astrocytic glutamate transporters GLAST and GLT-1. Images were taken by confocal microscopy. Scale bar = 50  $\mu$ m. (G-I) Gene expression of the astrocytic markers (G) *Gfap* ( $***P < 0.001$ ), (H) *Aldh1l1* ( $*P = 0.0130$ ;  $***P < 0.001$ ) and (I) *Slc1a3*/Glast (AdAC CellC vs AdAC direct  $**P = 0.0034$ ; AdAC direct vs AGES  $**P = 0.0037$ ;  $***P < 0.001$ ) was determined by quantitative real-time PCR. All expression values were normalized to the internal control *Gapdh* and cultured neonatal astrocytes as a reference. Mean  $\pm$  SEM; neoAC CellC (n=3), neoAC (n=5), AdAC CellC (n=3), AdAC (n=4), AGES (n=3); ANOVA with Tukey's post hoc test.

**Figure 2**

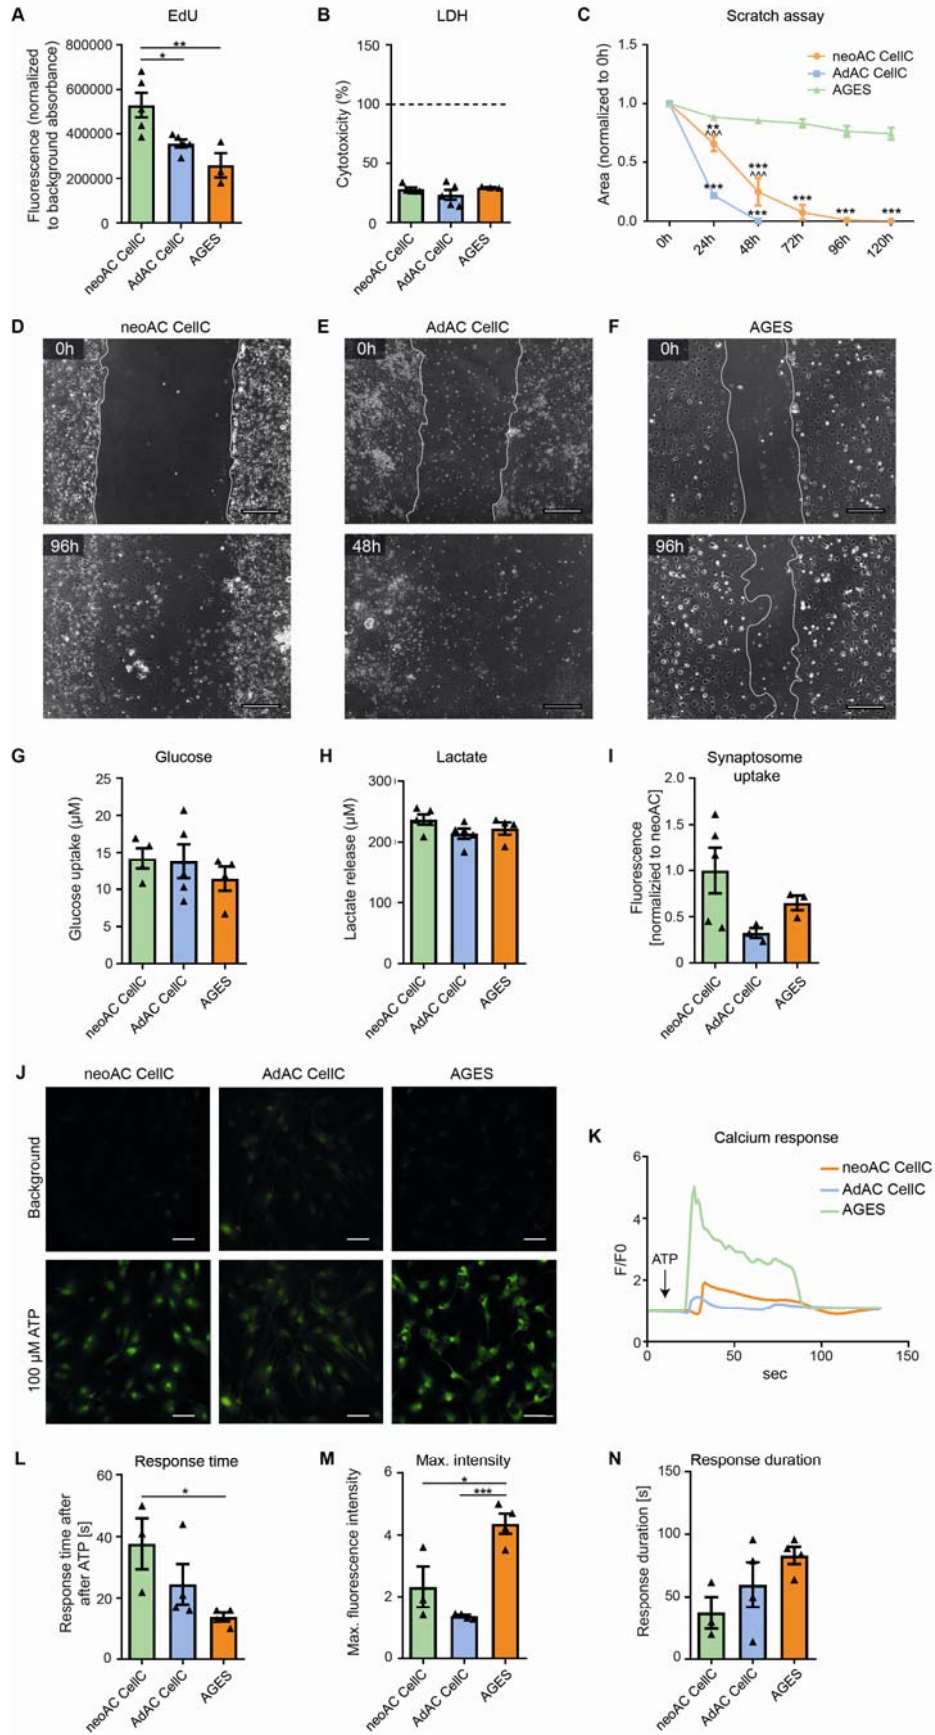

**Figure 2: Similarities in glucose uptake, lactate release and synaptosome uptake oppose differences in proliferative, migratory and calcium signaling of AGES and isolated astrocytes.**

(A) Proliferation was measured by fluorescent immunolabeling for the thymidine analogue EdU which is incorporated during cell division. Fluorescent signal was normalized to background absorbance. ANOVA with Tukey's post hoc test  $*P = 0.0365$ ;  $**P = 0.0068$  (B) Cytotoxicity was measured by determining the levels of lactate dehydrogenase (LDH) release to the cell supernatant. As a positive control, each cell type was lysed with Triton-X to induce maximal LDH release per cell (= 100 %, dashed line). Medium served as a negative control and all values were plotted as percentages of the maximal LDH release. Mean  $\pm$  SEM; neoAC CellC (n=5), AdAC CellC (n=5), AGES (n=3). ANOVA with Tukey's post hoc test  $P > 0.05$ . (C) A scratch assay was used to determine the migratory behaviour of cultured neonatal astrocytes (neoAC CellC), cultured adult astrocytes (AdAC CellC) and AGES. The area of the wound gap normalized to time point 0 h is shown over time. \* significance compared to AGES; ^ significance compared to AdAC CellC. Mean  $\pm$  SEM; neoAC CellC (n=4), AdAC CellC (n=4), AGES (n=4); Two-way ANOVA with Bonferroni post hoc test;  $**P = 0.004$ ;  $***P < 0.001$ ;  $^^^P < 0.001$ . (D-F) Representative phase contrast images of the wound gap at the starting point (0 h) and after 48 h/96 h are shown of (D) cultured neonatal astrocytes (neoAC CellC), (E) cultured adult astrocytes (AdAC CellC) and (F) AGES. Scale bar = 200  $\mu$ m. (G) Glucose uptake (in  $\mu$ M) in cultured neonatal astrocytes (neoAC CellC), cultured adult astrocytes (AdAC CellC) and AGES was measured with a luminescence-based assay. Mean  $\pm$  SEM; neoAC CellC (n=4), AdAC CellC (n=5), AGES (n=4). ANOVA with Tukey's post hoc test  $P > 0.05$ . (H) To determine the lactate released by each cell type (in  $\mu$ M), lactate was measured in the cell supernatant with a luminescence-based assay. Mean  $\pm$  SEM; neoAC CellC (n=5), AdAC CellC (n=5), AGES (n=4). ANOVA with Tukey's post hoc test  $P > 0.05$ . (I) pH-sensitive fluorescently labelled synaptosomes isolated from C57Bl/6J mice were cocultured with cultured neonatal astrocytes (neoAC CellC), cultured adult astrocytes (AdAC CellC) and AGES. The fluorescence was measured and represents the uptake of synaptosomes. The fluorescent signals were normalized to cultured neonatal astrocytes. Mean  $\pm$  SEM; neoAC CellC (n=5), AdAC CellC (n=3), AGES (n=3). ANOVA with Tukey's post hoc test  $P > 0.05$ . (J-N) Calcium signaling of all three cell types was determined by calcium imaging using Fluo-4, AM as a calcium indicator and 100  $\mu$ M ATP as a stimulus for calcium release. (J) Representative images of cultured neonatal astrocytes (neoAC CellC), cultured adult astrocytes (AdAC CellC) and AGES are shown before ATP stimulation (= background) and after ATP stimulation. Scale bar = 50  $\mu$ m. (K) The fluorescence intensity normalized to background fluorescence (F/F<sub>0</sub>) is shown over time for each cell type. (L) The time until cells responded with a calcium peak was measured. ANOVA with Tukey's post hoc test  $*P = 0.0493$  (M) The maximum fluorescence intensity was compared between all cell types. ANOVA with Tukey's post hoc test  $*P = 0.012$ ;  $***P < 0.001$ . (N) The time until cells returned to baseline levels was determined. Mean  $\pm$  SEM; neoAC CellC (n=3), AdAC CellC (n=4), AGES (n=4); ANOVA with Tukey's post hoc test;  $P > 0.05$ .

**Figure 3**

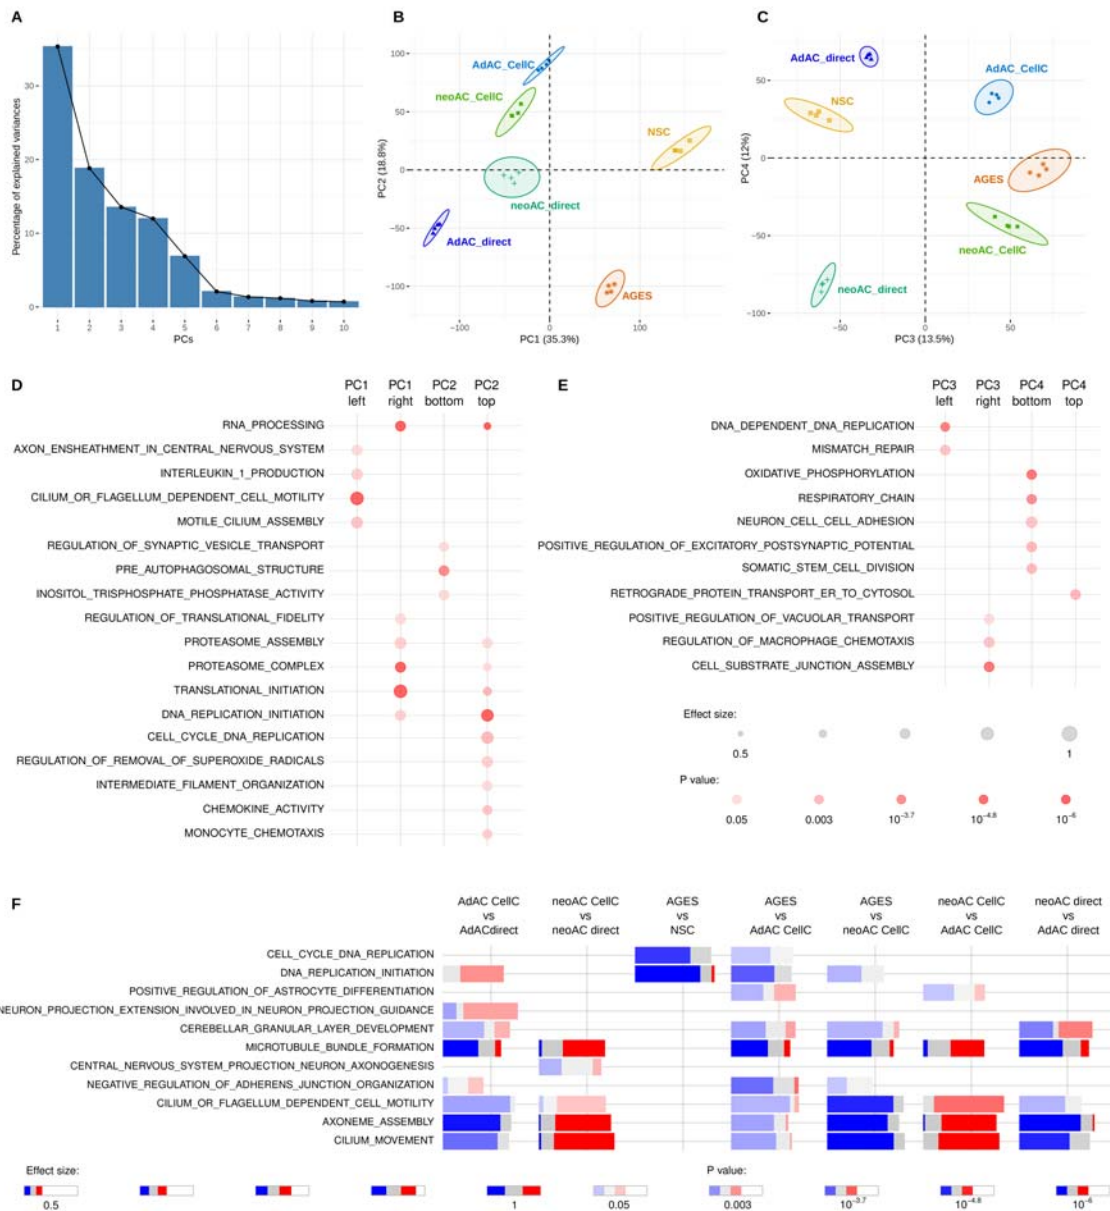

**Figure 3: Transcriptomic profiling of astrocytes reveals major differences introduced by cell culturing, age and cell origin.**

RNA-seq was performed from cultured neonatal astrocytes (neoAC CellC; n=4), directly isolated neonatal astrocytes (neoAC direct; n=4), cultured adult astrocytes (AdAC CellC; n=4), directly isolated adult astrocytes (AdAC direct; n=4), AGES (n=4) and NSCs (n=4). (A-C) Principal component analysis (PCA) of RNA-seq results was performed and gene set enrichment analysis applied to genes ordered by their PCA loadings. The variance explained by the components is shown on the x- and y-axis. (D-E) Selected gene ontology (GO) terms characterizing each principal component are shown. The size of each dot reflects the effect size while the p-value is visualized by color intensity. (F) Differential gene expression-based functional enrichment analysis between cell types was done using the R tmod package. Each bar presents the fraction of significantly up (red) and downregulated (blue) genes in that particular GO category. The effect size is the area under the curve (see Fig. S3F).

**Supplementary Figure S1**

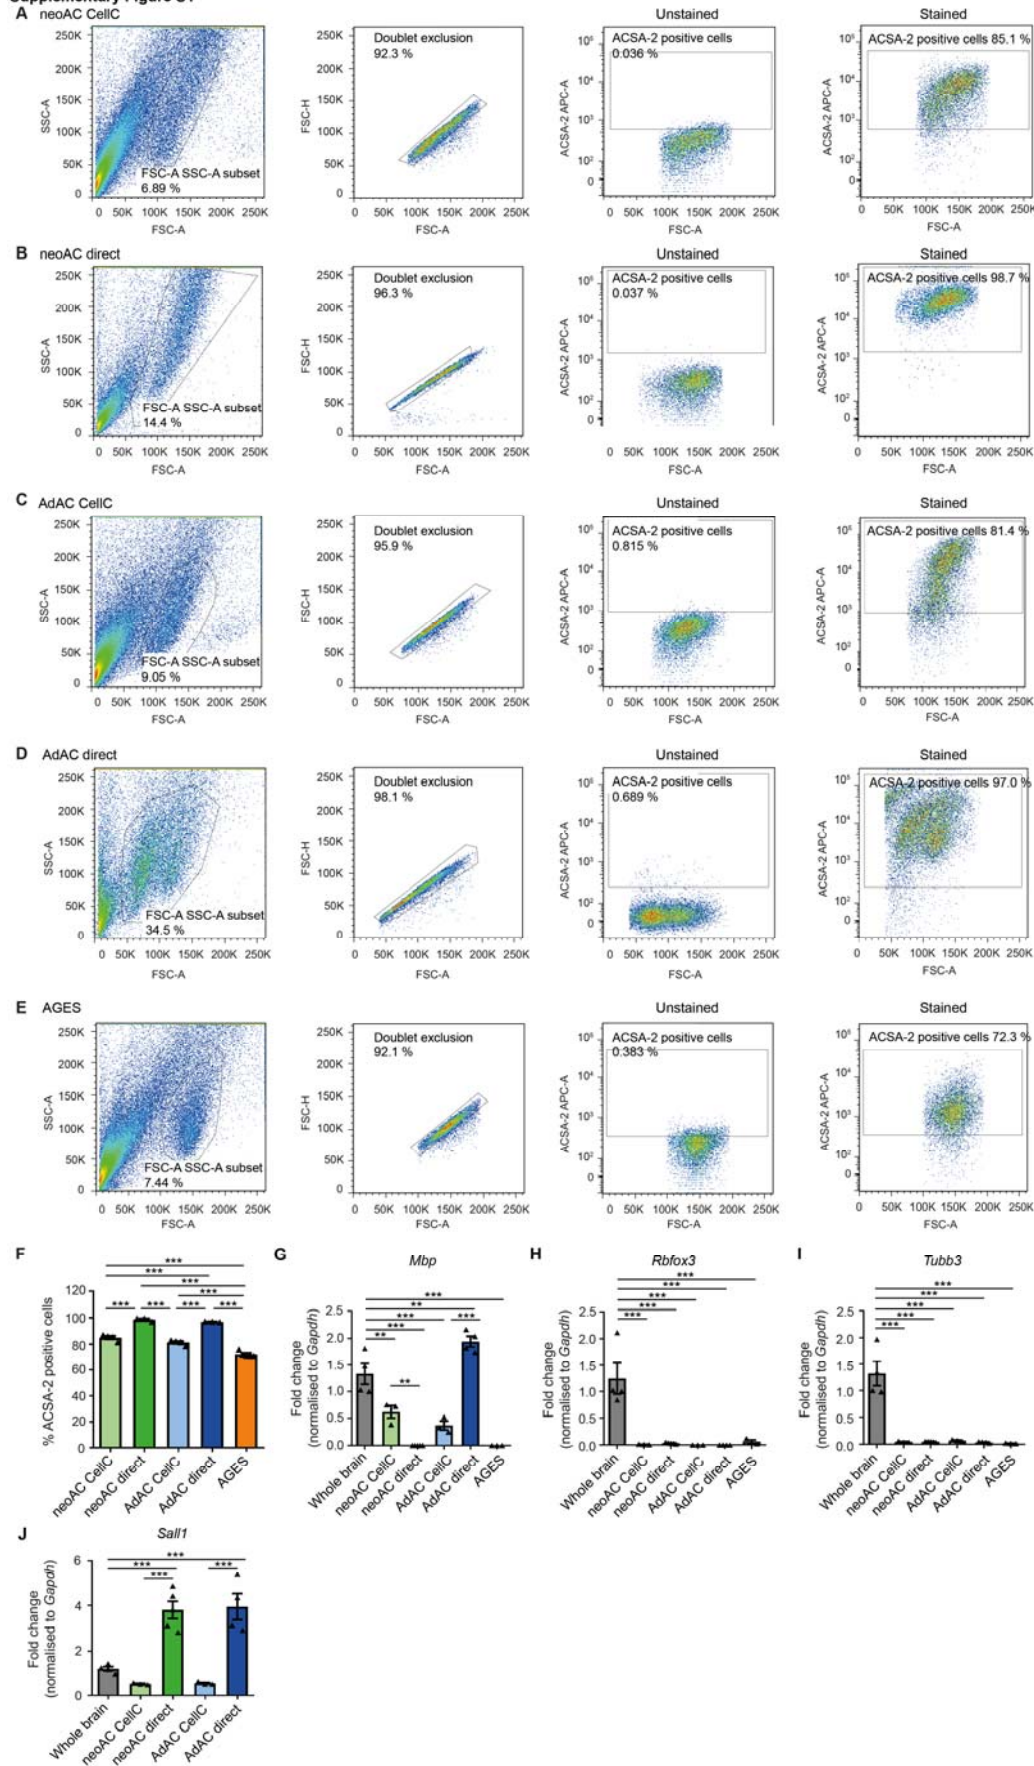

**Figure S1: Cell purity and cell type composition changes during cell culturing**

(A-E) Fluorescence activated cell sorting (FACS) of ACSA-2-labelled (stained) and unlabelled (unstained) cell suspensions is shown, demonstrating doublet exclusion and gating for APC-labelled ACSA-2 positive cells based on ACSA-2 negative stain in (A) cultured neonatal astrocytes (neoAC CellC), (B) directly isolated neonatal astrocytes (neoAC), (C) cultured adult astrocytes (AdAC CellC), (D) directly isolated adult astrocytes (AdAC) and (E) AGES. Representative FACS blots are shown for each cell type which include the average percentage of ACSA-2 positive cells. (F) Quantities of ACSA-2 expression levels in primary astrocytes and AGES as determined by FACS were summarized. Mean  $\pm$  SEM; neoAC CellC (n=4), neoAC (n=3), AdAC CellC (n=4), AdAC (n=3), AGES (n=5). ANOVA with Tukey's post hoc test  $***P < 0.001$ . (G-J) Gene expression of non-astrocytic cell markers was determined by quantitative real-time PCR in cultured neonatal astrocytes (neoAC CellC), directly isolated neonatal astrocytes (neoAC), cultured adult astrocytes (AdAC CellC), directly isolated adult astrocytes (AdAC) and AGES. (G) *Mbp* was used as an oligodendrocytic marker (whole brain vs AdAC direct  $**P = 0.008$ ; whole brain vs neoAC CellC  $**P = 0.004$ ;  $***P < 0.001$ ). (H,I) *Rbfox3* (NeuN) and *Tubb3* represent neuronal marker genes ( $***P < 0.001$ ). (J) *Sall1* is a marker for microglia ( $***P < 0.001$ ). All expression values were normalized to the internal control *Gapdh* and whole brain lysates as a reference. Mean  $\pm$  SEM; Whole brain (n=4), neoAC CellC (n=3), neoAC (n=5), AdAC CellC (n=3), AdAC (n=4), AGES (n=3); ANOVA with Tukey's post hoc test; significances were only indicated for meaningful comparisons.

## Supplementary Figure 2

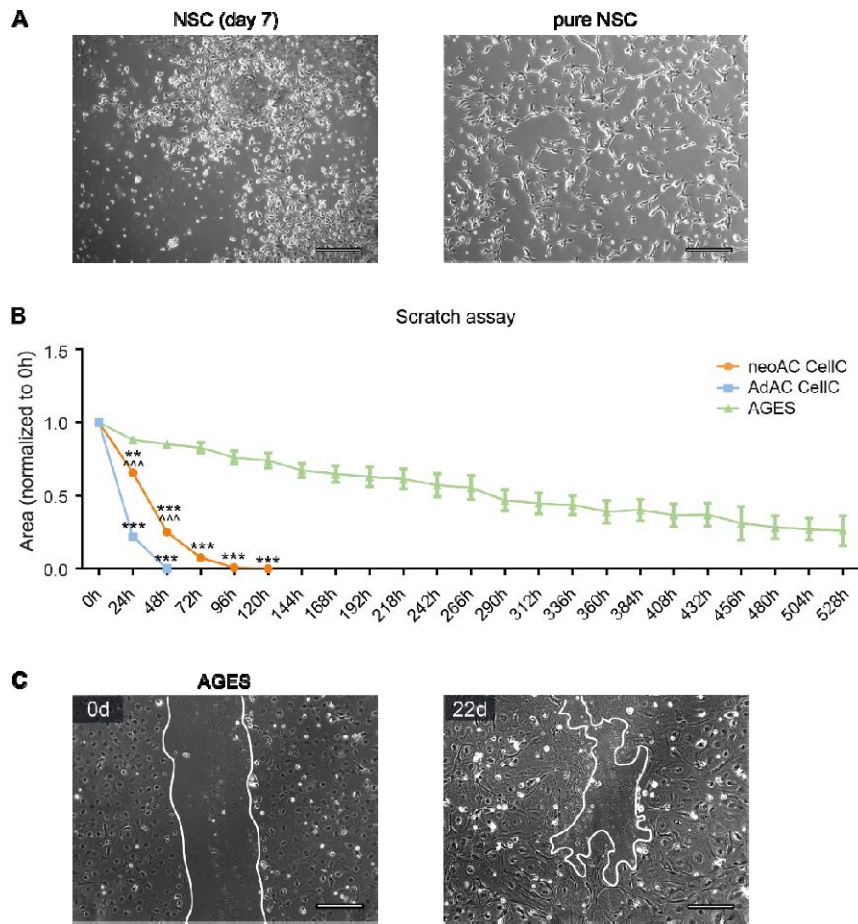

Figure S2: Migratory behavior of primary astrocytes and AGES over 22 days

(A) NSCs were differentiated from mESCs. For receiving pure bipolar NSC cultures, NSCs were cultured for at least eight passages in medium containing the growth factors EGF and FGF. Representative phase contrast images of NSC 7 days after starting the differentiation (mixed mESC and NSC culture) and pure NSC cultures are shown. Scale bar = 200  $\mu$ m. (B) A scratch assay was used to determine the migratory behaviour of cultured neonatal astrocytes (neoAC CellC), cultured adult astrocytes (AdAC CellC) and AGES. The area of the wound gap normalized to time point 0 h is shown over time. \* significance compared to AGES; ^ significance compared to AdAC CellC. Mean  $\pm$  SEM; neoAC CellC (n=4), AdAC CellC (n=4), AGES (n=4); Two-way ANOVA with Bonferroni post hoc test; \*\* $P$  = 0.004; \*\*\* $P$  < 0.001; ^^^ $P$  < 0.001. (C) Representative phase contrast images of the wound gap at the starting point (0 d) and after 22 days are shown of AGES. Scale bar = 200  $\mu$ m.



Supplementary Figure 3

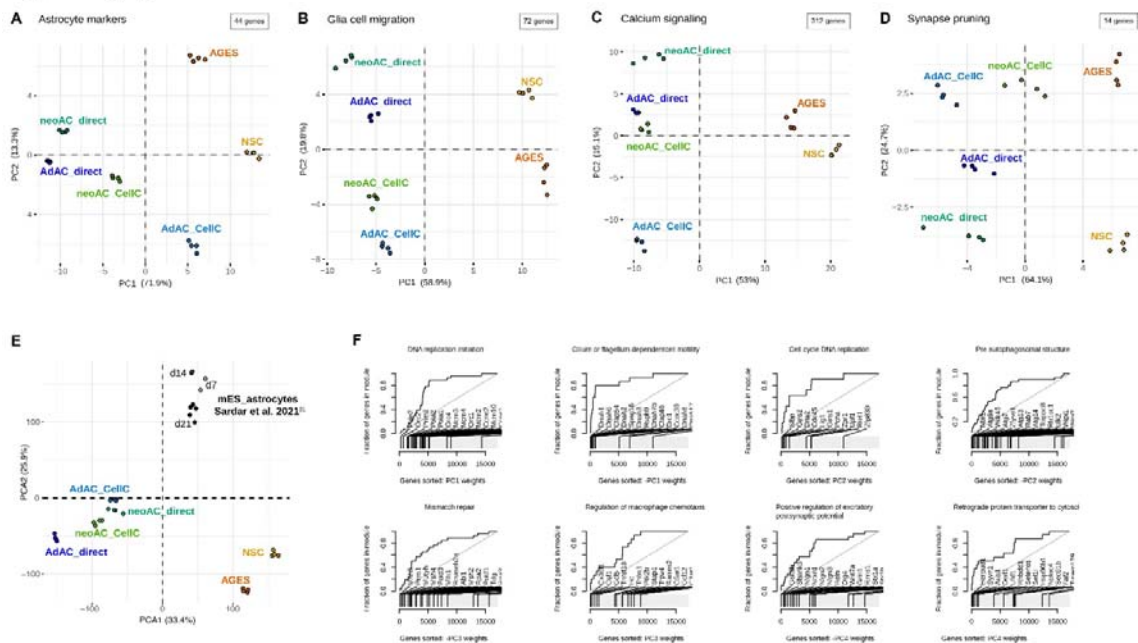

Figure S3: Principal component analysis and evidence plots of RNA-seq data underline functional differences between astrocytic cell types.

RNA-seq was performed from cultured neonatal astrocytes (neoAC CellC; n=4), directly isolated neonatal astrocytes (neoAC direct; n=4), cultured adult astrocytes (AdAC CellC; n=4), directly isolated adult astrocytes (AdAC direct; n=4), AGES (n=4) and NSCs (n=4). (A) Principal component analysis (PCA) of published astrocytic marker genes<sup>5</sup> is shown. (B-D) Principal component analysis (PCA) of samples based only on genes from select GO terms relating to our functional assays was performed. The variance explained by the first and second component is shown on the x- and y-axis. (E) PCA of our samples and mouse embryonic stem cell-derived astrocytes (mES\_astrocytes) from different time points of culture (day 7, 14, 21) published by Sardar et al.<sup>31</sup>. (F) Evidence plots of select GO terms from Fig. 6B displaying genes sorted based on the gene PCA loadings on the x-axis and cumulative fraction of genes from a particular gene set (GO term) on the y-axis.

|                                                               | NeoAC CellC | neoAC direct | AdAC CellC | AdAC direct | AGES   | NSC |
|---------------------------------------------------------------|-------------|--------------|------------|-------------|--------|-----|
| <b>Marker profile</b>                                         |             |              |            |             |        |     |
| Astrocyte protein marker expression (GFAP/Nestin/GLAST/GLT-1) | ✓           |              | ✓          |             | ✓      |     |
| <i>Gfap</i> gene expression                                   | ↑↑          | ↑            | ↑          | ↑           | ↑↑↑    |     |
| <i>Aldh1l1</i> gene expression                                | ↑↑          | ↑↑↑          | ↑          | ↑           | -      |     |
| <i>Glast/Slc1a3</i> gene expression                           | ↑↑          | ↑↑↑          | ↑          | ↑↑          | ↑      |     |
| ACSA-2-positive cells (cell purity)                           | 85.1 %      | 98.7 %       | 81.4 %     | 97.0 %      | 72.3 % |     |
| <i>Mbp</i> gene expression                                    | ↑           | -            | ↑          | ↑↑          | -      |     |
| <i>Rbfox3</i> gene expression                                 | -           | -            | -          | -           | -      |     |
| <i>Tubb3</i> gene expression                                  | -           | -            | -          | -           | -      |     |
| <i>Sall1</i> gene expression                                  | ↑           | ↑↑           | ↑          | ↑↑          |        |     |
| <b>Functional assays</b>                                      |             |              |            |             |        |     |
| Proliferation                                                 | ↑↑          |              | ↑          |             | ↑      |     |
| Cell death                                                    | +/-         |              | +/-        |             | +/-    |     |
| Wound healing                                                 | ↑           |              | ↑↑         |             | ↓      |     |
| Glucose uptake                                                | +/-         |              | +/-        |             | +/-    |     |
| Lactate release                                               | +/-         |              | +/-        |             | +/-    |     |
| Synaptosome uptake                                            | +/-         |              | +/-        |             | +/-    |     |
| Calcium release response time                                 | ↑↑          |              | ↑          |             | ↑      |     |
| Calcium released                                              | ↑           |              | ↑          |             | ↑↑     |     |
| Calcium signalling response duration                          | +/-         |              | +/-        |             | +/-    |     |
| <b>Transcriptomic changes</b>                                 |             |              |            |             |        |     |
| Cilium function genes                                         | ↑↑↑         | ↑            | ↑          | ↑↑↑         | ↑      | -   |
| Microtubule genes                                             | ↑↑↑         | ↑↑           | ↑↑         | ↑↑↑         | ↑      | -   |
| Cell cycle genes                                              | ↑↑↑         | ↑↑           | ↑↑↑        | ↑           | ↑      | ↑↑↑ |
| Autophagy genes                                               | -           | -            | -          | -           | ↑↑↑    | ↑   |
| Synaptic vesicle exocytosis regulation genes                  | ↑           | ↑↑↑          | ↑          | ↑↑↑         | ↑↑↑    | -   |
| Chemotaxis genes                                              | ↑↑↑         | ↑            | ↑↑↑        | ↑           | ↑↑     | ↑↑  |
| Mitochondrial respiration genes                               | ↑↑↑         | ↑↑↑          | ↑          | ↑           | -      | -   |
| Cell adhesion genes                                           | ↑↑↑         | ↑↑↑          | ↑          | ↑           | -      | -   |

Figure S4: Summary of experimental results comparing cultured and directly isolated primary cells and AGES.

Summary of the comparison of neonatal astrocytes (neoAC CellC), directly isolated neonatal astrocytes (neoAC direct), cultured adult astrocytes (AdAC CellC), directly isolated adult astrocytes (AdAC direct) and AGES. The following symbols were used for visualizing the obtained results: Grey box = The assay was not performed for these cells, ✓ = presence for indicated attributes, ↑ = low expression/ functional activity, ↑↑ = intermediate expression/ functional activity, ↑↑↑ = high expression/ functional activity, - = no expression, +/- = no change in all analyzed groups.

## 236 **Methods**

### 237 ***Mice***

238 For adult astrocyte cultures C57BL/6J mice at an age of > 100 days were used, whilst neonatal cells  
239 were taken from p 4-8 C57BL/6J pups. Female and male mice were mixed for all analyses. Mice were  
240 group housed under specific pathogen-free conditions on a 12 h light/dark cycle, and food and water  
241 were provided to the mice ad libidum. All animal experiments were performed in accordance with  
242 the national animal protection guidelines approved by the regional offices for health and social  
243 services in Berlin (LaGeSo, license numbers T 0276/07 and O298/17).

### 244 ***Adult astrocyte isolation via MACS***

245 Adult astrocytes were isolated using Magnetic-Activated Cell Sorting (MACS; Miltenyi Biotec)  
246 according to manufacturer's protocol. In brief, mice were anesthetized with Isoflurane, euthanized  
247 with CO<sub>2</sub>, the brain dissected and placed in cold D-PBS supplemented with 0.91 mM CaCl<sub>2</sub>, 0.49 mM  
248 MgCl<sub>2</sub>·6H<sub>2</sub>O, 0.55 mM glucose and 0.033 mM sodium pyruvate (pH 7.2) (termed D-PBS). For direct  
249 astrocyte isolation, the olfactory bulb and cerebellum were removed and brains of two mice were  
250 pooled for tissue dissociation. Tissue dissociation was performed in C-tubes (Miltenyi, 130-096-334)  
251 using the Adult Brain Dissociation Kit (Miltenyi, 130-107-677) on program 37C\_ABDK\_01 of the  
252 gentleMACS™ Octo Dissociator with Heaters (Miltenyi Biotec, 130-096-427) allowing for  
253 simultaneous enzymatic and mechanical tissue disruption. Red blood cells and debris were removed  
254 and astrocytes magnetically labelled using ACSA-2 microbeads (Miltenyi Biotec, 130-097-678)  
255 according to manufacturer's protocol. The resulting cell suspension was filtered once through a 70  
256 µm pre-separation filter, consecutively passed through two MS columns (Miltenyi Biotec, 130-042-  
257 201) placed on a OctoMACS™ manual separator and flushed into Eppendorf tubes in 0.5 % BSA in  
258 PBS, pH 7.2 or cell culture medium (see section on astrocyte culture below). Cell pellets were  
259 collected, snap-frozen in liquid nitrogen and stored at -80 °C until further use.

### 260 ***Neonatal astrocyte isolation via MACS***

261 Neonatal astrocytes were isolated by using MACS from p 4-8 C57BL/6J mice. Cerebral tissue was  
262 isolated, meninges removed and brains of two mice pooled in a C-tube for tissue dissociation with  
263 the Neural Tissue Dissociation Kit (Miltenyi, 130-092-628) on program 37C\_NTDK\_1 of the  
264 gentleMACS™ Octo Dissociator with Heaters (Miltenyi Biotec, 130-096-427) allowing for  
265 simultaneous enzymatic and mechanical tissue disruption. Afterwards, the cell suspension was  
266 washed with Hanks' Balanced Salt solution without calcium and magnesium (HBSS, Thermo Fisher,  
267 14170138) and astrocytes magnetically labelled with ACSA-2 microbeads (Miltenyi Biotec, 130-097-  
268 678), according to manufacturer's protocol. The resulting cell suspension was filtered once through a  
269 70 µm pre-separation filter, consecutively passed through two MS columns (Miltenyi Biotec, 130-  
270 042-201) placed on a OctoMACS™ manual separator and flushed into Eppendorf tubes in 0.5 % BSA  
271 in PBS, pH 7.2 or cell culture medium (see section on astrocyte culture below). Cell pellets were  
272 collected, snap-frozen in liquid nitrogen and stored at -80 °C until further use.

273

## 274 ***Adult and neonatal astrocyte culture***

275 Cell culture plates (24-well or 96-well as indicated; BD Biosciences) were prepared two days prior to  
276 astrocyte isolation. First, wells were coated with 20 µg/ml poly-L-lysine (PLL) (Sigma, 2636-25MG) in  
277 PBS overnight at 37 °C, 5 % CO<sub>2</sub>. The next day, wells were washed twice with PBS and subsequently  
278 coated with 2 µg/ml laminin in PBS (Sigma, L2020) overnight at 37 °C, 5 % CO<sub>2</sub>. For  
279 immunofluorescence, cells were plated onto 13 mm coverslips (VWR) coated with 0.5 mg/ml PLL and  
280 10 µg/ml laminin. For calcium imaging, cells were plated onto glass bottom dishes (MatTek, P35G-  
281 1.5-14-C) coated with 0.5 mg/ml PLL and 10 µg/ml laminin. Astrocyte isolation was performed as  
282 described above under sterile conditions. ACSA-2 labelled cells were flushed from the MS column  
283 with pre-warmed AstroMACS medium (Miltenyi Biotec, 130-117-031) supplemented 50 U/ml  
284 penicillin/streptomycin (Sigma, P0781-20ML) and 0.25 % L-glutamine (0.5 mM; Thermo Fisher,  
285 25030-024). Neonatal and adult astrocytes were cultured using the same medium composition. Cells  
286 were plated at 100,000 cells/24 well or glass dish or 25,000 cells/96 well onto the middle of the well  
287 in a droplet of AstroMACS medium and incubated at 37 °C, 5 % CO<sub>2</sub> for 1-3 h before filling up the  
288 medium. Medium was changed every three days and grown for 7-10 days before use.

## 289 ***Astrocyte differentiation from embryonic stem cells***

290 Astrocytes were differentiated from mouse embryonic stem cells (mESCs; GSC-5003, MTI-  
291 GlobalStem) using a previously published protocol<sup>16</sup>. mESCs were first differentiated into neural stem  
292 cells (NSCs) by plating mESCs as single cells on flasks coated with 0.1 % gelatin (Sigma, G9391-100G)  
293 in N2B27 medium (1 part DMEM/F12 medium (Thermo Fisher, 11320-033), 1 part Neurobasal  
294 medium (Thermo Fisher, 21103-049) supplemented with 1 % N2 supplement (Thermo Fisher, 17502-  
295 048), 2 % B27 supplement (Thermo Fisher, 17504-044), 2 mM Glutamax (Thermo Fisher, 35050-038),  
296 55 µM 2-mercaptoethanol (Thermo Fisher, 21985-023), 0.075 % Insulin (Sigma, I0278-5ML), 50  
297 mg/ml bovine serum albumin (BSA, Thermo Fisher, 15260-037) and 50 U/ml penicillin/streptomycin  
298 (Sigma, P0781-20ML). After differentiating mESCs to NSCs for 14 days, cells were detached with 0.05  
299 % trypsin and re-plated on 0.1 % gelatin-coated flasks as single cells in N2B27 medium supplemented  
300 with 20 ng/ml FGF (Peprotech, 450-33) and 20 ng/ml EGF (Peprotech, AF-315-09). At this stage, the  
301 NSC culture consisted of an inhomogeneous culture with bipolar, triangular and aggregating cells  
302 (Fig. S2A). For selection and maintenance of bipolar NSCs, cells were split at a density of 80-90 % by  
303 tapping flasks for removing cell aggregates. Cells were washed with PBS once and detached with 0.05  
304 % trypsin for 10-15 sec. Here, the more trypsin sensitive-bipolar NSCs went into suspension while  
305 triangular cells remained attached. After 10-15 sec of trypsinization, trypsin was diluted with 1 part  
306 PBS and the cell suspension was filtered through a 70 µm cell strainer into a tube prefilled with 2  
307 parts PBS. Cells were centrifuged at 900 g for 3 min and resuspended in N2B27 medium  
308 supplemented with 20 ng/ml FGF and 20 ng/ml EGF. For all experiments described here, NSCs with a  
309 passage number from 50-60 were used to assure full purity.

310 For differentiating NSCs into astrocytes generated from ESCs (AGES), plates or dishes were coated  
311 with 10 µg/ml Poly-L-Ornithine (PLO, Sigma, P4957) in PBS for at least 2 h, wells were washed twice  
312 with PBS and subsequently coated with 2 µg/ml laminin (Sigma, L2020) in PBS overnight at 37 °C, 5 %

313 CO<sub>2</sub>. NSCs were detached as described for cell maintenance and seeded at a density of 100,000 cells  
314 into precoated 24 wells in N2B27 medium supplemented with 20 ng/ml BMP4 (Peprotech, 315-27).  
315 After 3 days of differentiation in BMP4-supplemented N2B27 medium, AGES were used for described  
316 experiments. Medium was changed on day 1 of differentiation and every 3 days afterwards.

### 317 ***Immunocytochemistry and confocal microscopy***

318 Cells were washed once with pre-warmed PBS and fixed for 20 min at room temperature (RT) in  
319 freshly prepared 4 % paraformaldehyde (PFA) in PBS buffer, pH 7.4. Membranes were permeabilized  
320 with 0.1 % Triton-X100 in PBS for 20 min at RT and samples were blocked with freshly prepared 3 %  
321 bovine serum albumin (BSA, Merck) in PBS for 1 h at RT. GFAP (Abcam, ab4674, 1:1000), GLAST  
322 (Abcam, ab416, 1:200), Nestin (Abcam, Ab81755, 1:100) and GLT-1 (Sigma-Aldrich, Ab1783, 1:500)  
323 primary antibodies were diluted in PBS and incubated overnight at 4 °C. Following washes in PBS,  
324 Alexa Fluor® 647 Goat Anti-Rabbit (Thermo Fisher, A21244), Alexa Fluor® 647 Goat Anti-Guinea Pig  
325 (Thermo Fisher, A21450) and Cy™5 Donkey Anti-Chicken (Jackson ImmunoResearch, 703-175-155)  
326 secondary antibodies were diluted 1:500 in PBS and incubated at RT for 2 h. Nuclei were stained with  
327 5 mg/ml 4',6-diamidino-2-phenylindole (DAPI; Roche, 1023627600) in PBS for 1 min and coverslips  
328 were mounted onto SuperFrost® Plus slides (R. Langenbrink) with fluorescent Aqua-Poly/Mount  
329 mounting medium (Polysciences, 18606-20). The cells were imaged using a Leica TCS SP5 confocal  
330 laser scanning microscope and an HCX PL APO lambda blue 63× oil UV objective or HCX PL APO  
331 40.0x1.30 OIL objective controlled by the LAS AF scan software (Leica Microsystem, Germany). Three-  
332 dimensional image stacks (1 µm step size) were taken and are shown as maximum projections.

### 333 ***FACS analysis of purity***

334 For Fluorescence-Activated Cell Sorting (FACS) of cultured cells, cells were detached in PBS using a  
335 cell scraper. For FACS analysis directly after cell isolation, cells were collected after flushing from MS  
336 columns. Cells were pelleted by centrifugation at 300 g, 10 min, 4 °C and stained with the APC-  
337 labelled ACSA-2 antibody (1:10, Miltenyi Biotec, 130-102-315) in 0.5 % BSA in PBS, pH 7.2 for 10 min  
338 at 4 °C. Cells were washed in 0.5 % BSA in PBS, pH 7.2 and collected by centrifugation followed by  
339 FACS analysis. Flow cytometry was performed using a FACSCanto II (BD Biosciences) and analyzed  
340 with FlowJo 7.6.5 software. Doublets were excluded by gating before analysing ACSA-2 levels.

### 341 ***RNA isolation and quality control***

342 Total RNA from frozen cell pellets or astrocytic cultures was isolated using the NucleoSpin miRNA kit  
343 (Macherey Nagel, 740971-250). RNA fractions containing small and large RNA were isolated and  
344 combined according to manufacturer's instructions. For quantitative real-time PCR experiments, the  
345 rDNase treatment was omitted whilst for sequencing experiments, rDNase treatment was included.  
346 RNA was eluted using pre-warmed RNase-free H<sub>2</sub>O, snap-frozen in liquid nitrogen and stored at -80  
347 °C until further use. RNA concentration was measured on a NanoQuant Plate™ using an Infinite® 200  
348 Pro plate reader and the i-control™ Microplate Reader Software (Tecan Life Sciences). For  
349 sequencing samples, RNA quality was further analysed by determining the RIN using the RNA

350 ScreenTape (Agilent, 5067-5576) measured on the 4200 TapeStation system (Agilent). Samples with a  
351 RIN over 7 and a concentration of at least 100 ng total RNA were used.

### 352 **Quantitative real-time PCR**

353 cDNA was synthesized from  $\leq 1\mu\text{g}$  RNA using the QuantiTect Reverse Transcription Kit (Qiagen,  
354 205311), snap-frozen and stored at  $-80\text{ }^{\circ}\text{C}$  until further use. Gene expression analyses were  
355 performed on 12 ng cDNA per reaction using the TaqMan Fast Advanced Master Mix (ABI, 4364103)  
356 in a 384 well plate on a QuantStudio™ 6 Flex Real-Time PCR System (Thermo Fisher, A28139). Each  
357 PCR cycle had the following conditions for denaturation, annealing and lastly, extension:  $95\text{ }^{\circ}\text{C}$  for 20  
358 sec  $95\text{ }^{\circ}\text{C}$  for 1 sec, and  $60\text{ }^{\circ}\text{C}$  for 20 sec. *Gapdh* was used as an internal control and the delta-delta Ct  
359 method was used for quantification. Three technical replicates per condition were performed. The  
360 following Taqman primers (Thermo Fisher) were used: *Gfap* (Mm01253033\_m1), *Aldh1l1*  
361 (Mm03048957\_m1), *Slc1a3* (Mm00600697\_m1), *Mbp* (Mm01266402\_m1), *Olig2*  
362 (Mm01210556\_m1), *Sall1* (Mm00491266\_m1), *Rbfox3* (Mm01248771\_m1), beta-III-tubulin (*Tuj1*)  
363 (Mm00727586\_s1), *Gapdh* (Mm99999915\_g1).

### 364 **Quantitation of cell proliferation**

365 Cell proliferation was measured based on the ability of living cells to incorporate EdU with the Click-  
366 iT™ EdU Microplate Assay (Invitrogen, 10214). The manufacturer's protocol was followed. Briefly,  
367 cells cultured at a density of 50,000 cells per 96 well were incubated with  $10\text{ }\mu\text{M}$  EdU diluted in  
368 respective medium for 72 h. Afterwards, the medium was removed and collected for the LDH  
369 cytotoxicity assay (see below) and cells were fixed and click-labeled. EdU was detected by using an  
370 anti-Oregon Green HRP antibody provided in the kit and incubated with an Amplex UltraRed reaction  
371 mixture for detection. Fluorescence was measured on the Infinite® 200 Pro plate reader (Tecan Life  
372 Sciences) using an emission wavelength of 530 nm and an integration time of  $40\text{ }\mu\text{sec}$ . The plate was  
373 read at the beginning of EdU incubation ( $t=0\text{h}$ ) and after staining ( $t=72\text{h}$ ) to normalize values for  
374 background fluorescence. Each measurement was normalized to reference absorbance at 600 nm.  
375 Two technical replicates per condition were performed.

### 376 **Cytotoxicity**

377 Cytotoxicity was assessed by measuring lactate dehydrogenase (LDH), an enzyme released upon cell  
378 lysis, using the CytoTox 96® Non-Radioactive Cytotoxicity Assay (Promega, G1780). As positive  
379 control for 100 % cytotoxicity, cells were lysed by adding 10 % Triton-X to the medium and incubated  
380 for 30 min at  $37\text{ }^{\circ}\text{C}$ . For LDH detection, the manufacturer's protocol was followed. In brief, cell  
381 medium of astrocytes used for the cell proliferation assay (see above) was added to the CytoTox 96®  
382 Reagent for 30 min before measuring absorbance at 492 nm (600 nm reference value) on an Infinite®  
383 200 Pro plate reader. All values were presented relative to lysed cell positive control. Two technical  
384 replicates per condition were performed.

### 385 **Wound sensing assay**

386 A “wound gap” was created by scratching a straight line through the confluent monolayer of 100,000  
387 cells/well in a 24 well plate using a sterile 200 µl pipette tip. To guarantee imaging of the same spot,  
388 a line was drawn on the outside of the well perpendicular to the scratch. The intersection was used  
389 as the area to take all photos. Photos were taken with a Carl Zeiss Axio observer Z1 inverted  
390 microscope at time point 0 h and every consecutive 24 h to monitor cellular migration. Quantification  
391 was performed using the ImageJ (NIH, Maryland, USA) ROI tool and the area which was not covered  
392 by cells was measured and normalized to the non-treated control.

### 393 ***Glucose Uptake***

394 Glucose uptake in AGES, neonatal and adult astrocytes plated on 96-well plates (50,000 cells per  
395 well) was measured with the Glucose Uptake-Glo™ Assay (Promega, J1341) according to  
396 manufacturer’s protocol. In brief, medium was removed and collected for the Lactate-Glo™ Assay  
397 (see below). Cells were washed once with PBS and 1 mM 2-deoxyglucose (2DG) in PBS was added for  
398 10 min to induce glucose uptake. The reaction was stopped using Stop Buffer followed by the  
399 addition of Neutralisation Buffer and the 2DG6P Detection Reagent. After 2 h, luminescence was  
400 measured on the Infinite® 200 Pro plate reader (Tecan Life Sciences) using no attenuation, 1000  
401 msec integration time and 0 msec settle time. Each measurement was normalized to reference  
402 absorbance at 600 nm at 0 h. Wells not containing any cells but included in the measurement  
403 protocol were used as a background reference. A standard curve ranging from 2.5 µM to 20 µM was  
404 generated with the provided 2DG6P standard to determine the glucose uptake concentration per  
405 well. Two technical replicates per condition were performed.

### 406 ***Lactate Release***

407 Lactate release was measured on cell medium collected from AGES, neonatal and adult astrocytes  
408 using the Lactate-Glo™ Assay (Promega, J5021). An equal volume of Lactate Detection Reagent was  
409 added and the plate shaken for 60 sec. After 1 h, luminescence was measured on the Infinite® 200  
410 Pro plate reader (Tecan Life Sciences) using no attenuation, 1000 msec integration time and 0 msec  
411 settle time. Each measurement was normalized to reference absorbance at 600 nm and to cell-free  
412 medium as a background reference. A standard curve ranging from 3.125 µM to 200 µM was  
413 generated with the provided lactate standard and used to determine the lactate release  
414 concentration. Two technical replicates per condition were performed.

### 415 ***Synaptosome uptake assay***

416 For the analysis of synaptosome uptake by primary astrocytes and AGES, pH-sensitive labelled  
417 synaptosomes were used. Synaptosomes were isolated as previously described<sup>40</sup>. Unperfused brains  
418 of C57BL/6J mice at 65-75 days were placed in half-frozen PBS and cortices removed. Cortices  
419 including hippocampus were cut into small pieces and homogenized with a Teflon Homogenizer in  
420 homogenization buffer (10.9 % sucrose, 20 mM HEPES, 0.029 % EDTA, protease inhibitor, pH 7.4).  
421 Afterwards, the homogenized brain was centrifuged for 10 min at 3000 rpm at 4 °C. The  
422 synaptosomes in the supernatant were pelleted for another 15 min at 12500 g at 4 °C. The pellet  
423 containing the synaptosomes was homogenized in homogenization buffer using the Teflon

424 homogenizer. Afterwards, synaptosomes were separated using a gradient of 0.8 M sucrose layered  
425 by 1.2 M sucrose and ultracentrifugation at 20100 g for 1 h 10 min at 4 °C. The synaptosome band  
426 formed between both sucrose layers was collected. Synaptosomes were pelleted by centrifugation at  
427 12500 g for 15 min and resuspended in 0.1 M sodium bicarbonate to label them with a pH-sensitive  
428 fluorogenic dye (pHrodo™ Red succinimidyl ester, Thermo Fisher, 10676983, 1:660 dilution) by  
429 rotation for 2 h at RT. After washing labelled synaptosomes three times, they were resuspended in  
430 PBS containing 5 % DMSO. Synaptosomes from one brain were resuspended in 100 µl final volume  
431 and were diluted 1:12.5 in culture medium and added to the cells for 24 h before reading  
432 fluorescence with an Infinite® 200 Pro plate reader at 560 nm excitation wavelength/ 585 nm  
433 emission wavelength.

#### 434 ***Calcium imaging***

435 Calcium imaging was performed on cells grown on glass bottom dishes (35 mm dish, 14 mm glass;  
436 MatTek, 35G-1.5-14-C) using the Fluo-4, AM calcium indicator (Thermo Fisher, F14201). For  
437 reconstitution, a 20 % Pluronic® F-127 (Sigma, P2443) in DMSO solution was mixed 1:1 with 10 mM  
438 Fluo-4AM in DMSO to yield a 10 % Pluronic® F-127/5 mM Fluo-4, AM working solution. On the day of  
439 imaging, cells were incubated with 5 µM Fluo-4, AM solution dissolved in sterile HEPES buffer (150  
440 mM NaCl, 5.4 mM KCl, 1.3 mM CaCl<sub>2</sub>, 0.83 mM MgSO<sub>4</sub> x 7 H<sub>2</sub>O, 10 mM HEPES, 5 mM D(+)-Glucose,  
441 pH 7.4) for 30 min at RT. Afterwards, the Fluo4, AM was removed and cells kept in HEPES buffer at 37  
442 °C, 5 % CO<sub>2</sub> until and during imaging. The dish was transferred to an Okolab Incubation Chamber.  
443 Imaging was conducted at the Advanced Medical Bioimaging Core Facility (AMBIO) at the Charité  
444 Universitätsmedizin Berlin using the Nikon Spinning Disc Confocal CSU-X setup with the Nikon Eclipse  
445 TI microscope. An ATP solution for inducing calcium release in astrocytes was prepared with a final  
446 concentration of 100 µM in HEPES buffer. Using the peristaltic perfusion system (Multi Channel  
447 Systems, PPS5), the cells were perfused with HEPES for 2 min, followed by a 30 sec perfusion with  
448 100 µM ATP and finally 1 min 30 sec in HEPES with a flow rate of 2.5 ml/min. Imaging was started  
449 after perfusing cells for 1 min 50 sec with HEPES. Intracellular Ca<sup>2+</sup> changes were detected using the  
450 NIS Elements Imaging Software (Nikon, Version 5.10). Analysis was conducted using the ImageJ  
451 software with the Time Series Analyzer V3 plugin. The magnitude of Ca<sup>2+</sup> concentration changes was  
452 detected via a temporal analysis of 10 single cells per n as a fluorescence intensity ratio F/F<sub>0</sub>. F<sub>0</sub> was  
453 determined at a baseline 10 second window prior to ATP administration. For analysis, the average  
454 maximum fluorescence intensity, the time until cells responded to ATP treatment and the peak width  
455 (time between maximum intensity and reaching basal levels) was determined.

#### 456 ***Library preparation and RNA sequencing***

457 RNA sequencing libraries were prepared using the TruSeq™ Stranded mRNA Library Prep kit  
458 (20020594, Illumina) starting from 100 ng of total RNA (RIN ≥7) on an epMotion® 5075 TMX  
459 workstation (Eppendorf). Library QC included size distribution check (BioAnalyser) and concentration  
460 determination with KAPA Library Quantification Kit (KK4857, Roche). Libraries were equimolar  
461 pooled and loaded on Illumina NovaSeq 6000 SP flowcell at 300 pM loading concentration with 1 %



462 of PhiX by-mix. Sequencing was performed in paired-end 2x100 nt sequencing mode with 8nt index  
463 (i7) read.

#### 464 **Data analysis**

465 RNA-seq reads were mapped to mouse genome (GRCm38/p5) with STAR (version 2.7.3a) using the  
466 following parameters: --outFilterType BySJout --outFilterMultimapNmax 20 --alignSJoverhangMin 8 -  
467 -alignSJDBoverhangMin 1 --outFilterMismatchNmax 999 --outFilterMismatchNoverLmax 0.04 --  
468 alignIntronMin 20 --alignIntronMax 1000000 --alignMatesGapMax 1000000<sup>41</sup>. We obtained on  
469 average 87.7% uniquely mapped reads per sample. Reads were assigned to genes with *featureCounts*  
470 (-t exon -g gene\_id, version 2.0.1) using Gencode GRCm38/vM12 gene annotation<sup>42</sup>. The differential  
471 expression analysis was carried out with DESeq2 (version 1.22.1) using default parameters. For the  
472 principal component analysis (PCA) (in Fig.6 B) we used rlog (DESeq2, version 1.22.1) transformed  
473 counts<sup>43</sup>. Gene ontology enrichment analysis was done with CERNO algorithm from R tmod (0.46.2)  
474 package<sup>44</sup>: for two sided comparisons (eg. AdAC CellC vs direct) genes were sorted by their adjusted  
475 (Benjamini Hochberg) p-values, and for PCA-based enrichment analysis genes were sorted by their  
476 PCA loadings. The enrichment analysis was done using GO gene set collection from MsigDB (r  
477 msigdb 6.2.1). Subcategories BP, MF and CC were combined for the analysis.

#### 478 **Statistics**

479 Data were generated as multiple exploratory analyses to generate hypotheses and biostatistical  
480 planning for future confirmatory studies. Data analysis, processing, descriptive and formal statistical  
481 testing were done according to the current customary practice of data handling using Excel 2016,  
482 GraphPad PRISM 5.0 and ImageJ. All data generated or analysed during this study are included in this  
483 article.

484 Values are presented as mean  $\pm$  SEM (standard error of the mean). Statistical difference between  
485 means was assessed either by the two-tailed t-test for two groups or ANOVA with the indicated post  
486 hoc test for more than two groups using the GraphPad Prism software. Outliers were not excluded  
487 and statistically significant values are indicated as  $*P \leq 0.05$ ,  $**P \leq 0.01$ , and  $***P \leq 0.001$ .

488

489

#### 490 **Acknowledgements**

491 This project has received funding from the Deutsche Forschungsgemeinschaft (DFG, German  
492 Research Foundation) under Germany's Excellence Strategy – EXC-2049 – 390688087, as well as HE  
493 3130/6-1 to F.L.H., the German Center for Neurodegenerative Diseases (DZNE) Berlin, and the  
494 Innovative Medicines Initiative 2 Joint Undertaking under grant agreement No 115976. This Joint  
495 Undertaking receives support from the European Union's Horizon 2020 research and innovation  
496 programme and EFPIA. S.S. was funded by a PhD fellowship of the NeuroCure Excellence Cluster EXC-  
497 2049.

498

499 **Author Contributions**

500 KF and PE performed experiments and analysed data; AI and DB performed and supervised  
501 bioinformatical analyses; SS isolated synaptosomes; TB and S. Sauer performed and supervised RNA  
502 library preparation and RNA sequencing; FLH designed and supervised the study; KF, PE and AI  
503 prepared figures. All authors wrote, revised and approved the manuscript.

504

505 **Declaration of Interests**

506 The authors declare that they have no conflict of interest.

507 **References**

- 508 1. Binmöller, F.-J. & Müller, C. M. (1992). Postnatal development of dye-coupling among  
509 astrocytes in rat visual cortex. *Glia* **6**, 127-137.
- 510 2. Finkbeiner, S. (1992). Calcium waves in astrocytes-filling in the gaps. *Neuron* **8**, 1101-1108.
- 511 3. Gordon, G. R., Choi, H. B., Rungta, R. L., Ellis-Davies, G. C. & Macvicar, B. A. (2008). Brain  
512 metabolism dictates the polarity of astrocyte control over arterioles. *Nature* **456**, 745-749.
- 513 4. Rouach, N., Koulakoff, A., Abudara, V., Willecke, K. & Giaume, C. (2008). Astroglial metabolic  
514 networks sustain hippocampal synaptic transmission. *Science* **322**, 1551-1555.
- 515 5. Araque, A., Carmignoto, G., Haydon, P. G., Oliet, S. H., Robitaille, R. & Volterra, A. (2014).  
516 Gliotransmitters travel in time and space. *Neuron* **81**, 728-739.
- 517 6. Palmer, A. L. & Ousman, S. S. (2018). Astrocytes and Aging. *Front Aging Neurosci* **10**, 337.
- 518 7. Matias, I., Morgado, J. & Gomes, F. C. A. (2019). Astrocyte Heterogeneity: Impact to Brain  
519 Aging and Disease. *Front Aging Neurosci* **11**, 59.
- 520 8. Guttenplan, K. A. & Liddelow, S. A. (2019). Astrocytes and microglia: Models and tools. *J Exp*  
521 *Med* **216**, 71-83.
- 522 9. McCarthy, K. D. & De Vellis, J. (1980). Preparation of separate astroglial and oligodendroglial  
523 cell cultures from rat cerebral tissue. *J Cell Biol* **85**, 890-902.
- 524 10. Zhang, Y., Sloan, S. A., Clarke, L. E., Caneda, C., Plaza, C. A., Blumenthal, P. D., Vogel, H.,  
525 Steinberg, G. K., Edwards, M. S., Li, G., Duncan, J. A., 3rd, Cheshier, S. H., Shuer, L. M., Chang,  
526 E. F., Grant, G. A., Gephart, M. G. & Barres, B. A. (2016). Purification and Characterization of  
527 Progenitor and Mature Human Astrocytes Reveals Transcriptional and Functional Differences  
528 with Mouse. *Neuron* **89**, 37-53.
- 529 11. Foo, L. C., Allen, N. J., Bushong, E. A., Ventura, P. B., Chung, W. S., Zhou, L., Cahoy, J. D.,  
530 Daneman, R., Zong, H., Ellisman, M. H. & Barres, B. A. (2011). Development of a method for  
531 the purification and culture of rodent astrocytes. *Neuron* **71**, 799-811.
- 532 12. Rusnakova, V., Honsa, P., Dzamba, D., Ståhlberg, A., Kubista, M. & Anderova, M. (2013).  
533 Heterogeneity of Astrocytes: From Development to Injury – Single Cell Gene Expression.  
534 *PLOS ONE* **8**, e69734.
- 535 13. Cahoy, J. D., Emery, B., Kaushal, A., Foo, L. C., Zamanian, J. L., Christopherson, K. S., Xing, Y.,  
536 Lubischer, J. L., Krieg, P. A., Krupenko, S. A., Thompson, W. J. & Barres, B. A. (2008). A  
537 transcriptome database for astrocytes, neurons, and oligodendrocytes: a new resource for  
538 understanding brain development and function. *J Neurosci* **28**, 264-278.
- 539 14. Batiuk, M. Y., De Vin, F., Duque, S. I., Li, C., Saito, T., Saido, T., Fiers, M., Belgard, T. G. & Holt,  
540 M. G. (2017). An immunoaffinity-based method for isolating ultrapure adult astrocytes based  
541 on ATP1B2 targeting by the ACSA-2 antibody. *J Biol Chem* **292**, 8874-8891.
- 542 15. Kantzer, C. G., Boutin, C., Herzig, I. D., Wittwer, C., Reiss, S., Tiveron, M. C., Drewes, J., Rockel,  
543 T. D., Ohlig, S., Ninkovic, J., Cremer, H., Pennartz, S., Jungblut, M. & Bosio, A. (2017). Anti-  
544 ACSA-2 defines a novel monoclonal antibody for prospective isolation of living neonatal and  
545 adult astrocytes. *Glia* **65**, 990-1004.
- 546 16. Kleiderman, S., Sa, J. V., Teixeira, A. P., Brito, C., Gutbier, S., Evje, L. G., Hadera, M. G., Glaab,  
547 E., Henry, M., Sachinidis, A., Alves, P. M., Sonnewald, U. & Leist, M. (2016). Functional and  
548 phenotypic differences of pure populations of stem cell-derived astrocytes and neuronal  
549 precursor cells. *Glia* **64**, 695-715.
- 550 17. Lattke, M., Goldstone, R., Ellis, J. K., Boeing, S., Jurado-Arjona, J., Marichal, N., MacRae, J. I.,  
551 Berninger, B. & Guillemot, F. (2021). Extensive transcriptional and chromatin changes  
552 underlie astrocyte maturation in vivo and in culture. *Nat Commun* **12**, 4335.
- 553 18. Eng, L. F., Ghirnikar, R. S. & Lee, Y. L. (2000). Glial fibrillary acidic protein: GFAP-thirty-one  
554 years (1969-2000). *Neurochem Res* **25**, 1439-1451.

- 555 19. Escartin, C., Galea, E., Lakatos, A. *et al.* (2021). Reactive astrocyte nomenclature, definitions,  
556 and future directions. *Nat Neurosci* **24**, 312–325.
- 557 20. Roybon, L., Lamas, N. J., Garcia, A. D., Yang, E. J., Sattler, R., Lewis, V. J., Kim, Y. A., Kachel, C.  
558 A., Rothstein, J. D., Przedborski, S., Wichterle, H. & Henderson, C. E. (2013). Human stem cell-  
559 derived spinal cord astrocytes with defined mature or reactive phenotypes. *Cell Rep* **4**, 1035-  
560 1048.
- 561 21. Guizzetti, M., Kavanagh, T. J. & Costa, L. G. (2011). Measurements of astrocyte proliferation.  
562 *Methods Mol Biol* **758**, 349-359.
- 563 22. Deitmer, J. W., Theparambil, S. M., Ruminot, I., Noor, S. I. & Becker, H. M. (2019). Energy  
564 Dynamics in the Brain: Contributions of Astrocytes to Metabolism and pH Homeostasis. *Front*  
565 *Neurosci* **13**, 1301.
- 566 23. Chung, W. S., Clarke, L. E., Wang, G. X., Stafford, B. K., Sher, A., Chakraborty, C., Joung, J.,  
567 Foo, L. C., Thompson, A., Chen, C., Smith, S. J. & Barres, B. A. (2013). Astrocytes mediate  
568 synapse elimination through MEGF10 and MERTK pathways. *Nature* **504**, 394-400.
- 569 24. Shigetomi, E., Kracun, S., Sofroniew, M. V. & Khakh, B. S. (2010). A genetically targeted  
570 optical sensor to monitor calcium signals in astrocyte processes. *Nat Neurosci* **13**, 759-766.
- 571 25. Julia, T.W.C., Wang, M., Pimenova, A. A., Bowles, K. R., Hartley, B. J., Lacin, E., Machlovi, S. I.,  
572 Abdelaal, R., Karch, C. M., Phatnani, H., Slesinger, P. A., Zhang, B., Goate, A. M. & Brennand,  
573 K. J. (2017). An Efficient Platform for Astrocyte Differentiation from Human Induced  
574 Pluripotent Stem Cells. *Stem Cell Rep* **9**, 600-614.
- 575 26. Bardehle, S., Krüger, M., Buggenthin, F., Schwausch, J., Ninkovic, J., Clevers, H., Snippert, H.  
576 J., Theis, F. J., Meyer-Luehmann, M., Bechmann, I., Dimou, L & Götz, M. (2013). Live imaging  
577 of astrocyte responses to acute injury reveals selective juxtavascular proliferation. *Nat*  
578 *Neurosci* **16**, 580–586.
- 579 27. Bradley, R. A., Shireman, J., Mcfalls, C., Choi, J., Canfield, S. G., Dong, Y., Liu, K., Lisota, B.,  
580 Jones, J. R., Petersen, A., Bhattacharyya, A., Palecek, S. P., Shusta, E. V., Kendzioriski, C. &  
581 Zhang, S.-C. (2019). Regionally specified human pluripotent stem cell-derived astrocytes  
582 exhibit different molecular signatures and functional properties. *Development* **146**,  
583 dev170910.
- 584 28. Collinet, C. & Lecuit, T. (2013). Stability and dynamics of cell-cell junctions. *Prog Mol Biol*  
585 *Transl Sci* **116**, 25-47.
- 586 29. Veland, I. R., Lindbæk, L. & Christensen, S. T. (2014). Linking the Primary Cilium to Cell  
587 Migration in Tissue Repair and Brain Development. *BioScience* **64**, 1115-1125.
- 588 30. Sardar D., Lozzi B., Woo J., Huang T. W., Cvetkovic C., Creighton C. J., Krencik R. & Deneen B.  
589 (2021) Mapping Astrocyte Transcriptional Signatures in Response to Neuroactive  
590 Compounds. *Int J Mol Sci* **22**, 3975.
- 591 31. Gerdes, J.M. & Katsanis, N (2008). Ciliary function and Wnt signal modulation. *Curr Top Dev*  
592 *Biol* **85**, 175-95.
- 593 32. Zhang, J., Nuebel, E., Daley, G. Q., Koehler, C. M. & Teitell, M. A. (2012). Metabolic regulation  
594 in pluripotent stem cells during reprogramming and self-renewal. *Cell Stem Cell* **11**, 589-595.
- 595 33. Pan, H., Cai, N., Li, M., Liu, G.-H. & Izpisua Belmonte, J. C. (2013). Autophagic control of cell  
596 'stemness'. *EMBO Mol Med* **5**, 327-331.
- 597 34. Sterpka, A., Yang, J., Strobel, M., Zhou, Y., Pauplis, C. & Chen, X. (2020). Diverged morphology  
598 changes of astrocytic and neuronal primary cilia under reactive insults. *Mol Brain* **13**, 28.
- 599 35. Kiprilov, E. N., Awan, A., Desprat, R., Velho, M., Clement, C. A., Byskov, A. G., Andersen, C. Y.,  
600 Satir, P., Bouhassira, E. E., Christensen, S. T., & Hirsch, R. E. (2008). Human embryonic stem  
601 cells in culture possess primary cilia with hedgehog signaling machinery. *J Cell Biol* **180**, 897–  
602 904. <https://doi.org/10.1083/jcb.200706028>

- 603 36. Tong, C. K., Han, Y. G., Shah, J. K., Obernier, K., Guinto, C. D., & Alvarez-Buylla, A. (2014).  
604 Primary cilia are required in a unique subpopulation of neural progenitors. *PNAS* **111**, 12438-  
605 12443.
- 606 37. Breunig, J. J., Sarkisian, M. R., Arellano, J. I., Morozov, Y. M., Ayoub, A. E., Sojitra, S., Wang,  
607 B., Flavell, R. A., Rakic, P. & Town, T. (2008). Primary cilia regulate hippocampal neurogenesis  
608 by mediating sonic hedgehog signaling. *PNAS* **105**, 13126–13131.
- 609 38. Rohatgi, R., Milenkovic, L. & Scott, M. P. (2007). Patched1 regulates hedgehog signaling at  
610 the primary cilium. *Science* **317**, 372-376.
- 611 39. Yoshimura, K., Kawate, T. & Takeda, S. (2011). Signaling through the primary cilium affects  
612 glial cell survival under a stressed environment. *Glia* **59**, 333-344.
- 613 40. Liu, C., Kershberg, L., Wang, J., Schneeberger, S. & Kaeser, P. S. (2018). Dopamine Secretion Is  
614 Mediated by Sparse Active Zone-like Release Sites. *Cell* **172**, 706-718.e715.
- 615 41. Dobin, A., Davis, C. A., Schlesinger, F., Drenkow, J., Zaleski, C., Jha, S., Batut, P., Chaisson, M.  
616 & Gingeras, T. R. (2012). STAR: ultrafast universal RNA-seq aligner. *Bioinformatics* **29**, 15-21.
- 617 42. Liao, Y., Smyth, G. K. & Shi, W. (2014). featureCounts: an efficient general purpose program  
618 for assigning sequence reads to genomic features. *Bioinformatics* **30**, 923-930.
- 619 43. Love, M. I., Huber, W. & Anders, S. (2014). Moderated estimation of fold change and  
620 dispersion for RNA-seq data with DESeq2. *Genome Biology* **15**, 550.
- 621 44. Zyla, J., Marczyk, M., Domaszewska, T., Kaufmann, S. H. E., Polanska, J. & Weiner, J., 3rd  
622 (2019). Gene set enrichment for reproducible science: comparison of CERNO and eight other  
623 algorithms. *Bioinformatics* **35**, 5146-5154.

624
